# Supplementary material
Source: publisher figshare collection journal article supplement (https://acs.figshare.com/ndownloader/files/14773427)
Supplement: Supplementary file 1 [file 14773427]

# Characterization of Complex Interactions at the Gas-Solid Interface with *In Situ* Spectroscopy: The Case of Nitrogen-Functionalized Carbon

*Michael J. Dzara,<sup>1</sup> Kateryna Artyushkova,<sup>2#</sup> Sarah Shulda,<sup>3</sup> Matthew B Strand,<sup>1</sup> Chilan Ngo,<sup>1</sup>  
Ethan J. Crumlin,<sup>4</sup> Thomas Gennett,<sup>1,3</sup> and Svitlana Pylypenko<sup>1\*</sup>*

<sup>1</sup>*Department of Chemistry, Colorado School of Mines, 1012 14<sup>th</sup> St., Golden, CO 80401, USA*

<sup>2</sup>*Department of Chemical and Biological Engineering, Center for Micro-Engineered Materials (CMEM), University of New Mexico, Albuquerque, NM 87131, USA*

<sup>3</sup>*National Renewable Energy Laboratory, 15013 Denver W. Pkwy, Golden, CO, 80401, USA*

<sup>4</sup>*Advanced Light Source, Lawrence Berkeley National Laboratory, 1 Cyclotron Rd., Berkeley, CA, 94720*

<sup>#</sup>*present address: Physical Electronics Inc., 18725 Lake Drive, East Chanhassen MN, 55317*

## Supporting Information

### Elemental Composition (at. %)

| Sample ID                       | C - EDS | C - XPS | O - EDS | O - XPS | N - EDS | N - XPS |
|---------------------------------|---------|---------|---------|---------|---------|---------|
| <b>N-C<sub>sph</sub> 600 °C</b> | 96.5    | 92.7    | 1.6     | 4.1     | 1.9     | 3.1     |
| <b>N-C<sub>sph</sub> 700 °C</b> | 96.7    | 93.3    | 1.5     | 3.6     | 1.9     | 3.0     |
| <b>N-C<sub>sph</sub> 900 °C</b> | 96.8    | 94.9    | 1.5     | 3.1     | 1.8     | 2.0     |
| <b>N-Vulcan</b>                 | 98.8    | 96.8    | 0.6     | 2.4     | 0.6     | 0.9     |
| <b>N-GnP</b>                    | 98.7    | 87.7    | 0.6     | 6.2     | 0.8     | 6.1     |

Table S1: Elemental compositions of all N-C samples obtained from EDS and XPS are displayed as atomic percentages.

### N 1s Fitting Parameters - UHV

| N Species                       | Electron-rich |          |       |          |       |          | Amine |          | Hydrogenated (in-plane) |          |       |          | Graphitic |          |       |          | Hydrogenated (edge) |          |
|---------------------------------|---------------|----------|-------|----------|-------|----------|-------|----------|-------------------------|----------|-------|----------|-----------|----------|-------|----------|---------------------|----------|
|                                 | BE            | % of Fit | BE    | % of Fit | BE    | % of Fit | BE    | % of Fit | BE                      | % of Fit | BE    | % of Fit | BE        | % of Fit | BE    | % of Fit | BE                  | % of Fit |
| <b>N-C<sub>sph</sub> 600 °C</b> | 397.6         | 3.7      | 398.1 | 28.0     | 398.7 | 12.7     | 399.5 | 11.0     | 400.1                   | 16.2     | 400.6 | 20.5     | 401.2     | 5.7      | 402.0 | 2.2      | X                   | 0.0      |
| <b>N-C<sub>sph</sub> 700 °C</b> | 397.6         | 7.4      | 398.0 | 20.4     | 398.7 | 11.4     | 399.4 | 10.7     | 400.1                   | 16.7     | 400.7 | 22.4     | 401.4     | 8.6      | 402.0 | 2.5      | X                   | 0.0      |
| <b>N-C<sub>sph</sub> 900 °C</b> | 397.6         | 1.0      | 398.0 | 18.4     | 398.7 | 9.4      | 399.3 | 6.9      | 400.1                   | 14.8     | 400.7 | 30.7     | 401.4     | 14.1     | 402.0 | 4.6      | X                   | 0.0      |
| <b>N-Vulcan</b>                 | X             | 0.0      | 398.0 | 3.3      | 398.8 | 16.4     | 399.3 | 10.8     | 399.9                   | 22.9     | 400.6 | 22.8     | 401.3     | 15.8     | 402.1 | 5.4      | 402.8               | 2.6      |
| <b>N-GnP</b>                    | X             | 0.0      | 398.2 | 8.1      | 398.7 | 18.4     | 399.4 | 23.0     | 400.0                   | 22.2     | 400.6 | 17.5     | 401.2     | 8.0      | 402.2 | 3.0      | X                   | 0.0      |

Table S2: Fitting parameters (BE and relative percentage of the fit) of the N 1s measured at UHV and ambient temperature are displayed for all components of all samples. Components that are not present in a sample are denoted with an X in the BE column. The FWHM of all components is 1.0 eV.

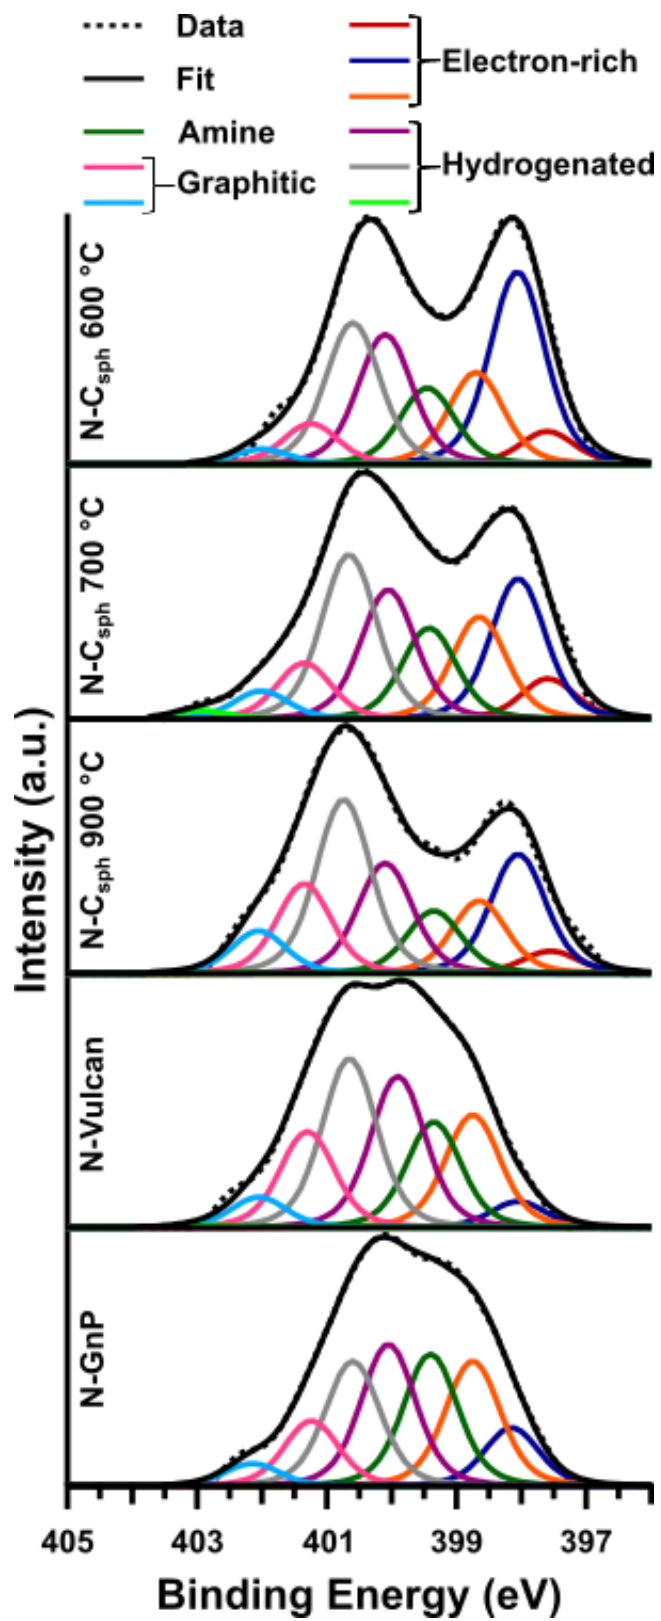

Figure S1: Deconvoluted N 1s spectra collected with synchrotron source energy (630 eV) at 100 mTorr O<sub>2</sub> at 60 °C are shown for all N-C materials.

### N 1s Fitting Parameters – O<sub>2</sub>; 60 °C

| Component                       | Electron-rich |          |       |          |       |          | Amine |          | Hydrogenated (in-plane) |          |       |          | Graphitic |          |       |          | Hydrogenated (edge) |          |
|---------------------------------|---------------|----------|-------|----------|-------|----------|-------|----------|-------------------------|----------|-------|----------|-----------|----------|-------|----------|---------------------|----------|
|                                 | BE            | % of Fit | BE    | % of Fit | BE    | % of Fit | BE    | % of Fit | BE                      | % of Fit | BE    | % of Fit | BE        | % of Fit | BE    | % of Fit | BE                  | % of Fit |
| <b>N-C<sub>sph</sub> 600 °C</b> | 397.6         | 4.5      | 398.1 | 26.8     | 398.7 | 12.8     | 399.5 | 10.5     | 400.1                   | 17.9     | 400.6 | 19.7     | 401.3     | 5.7      | 402.0 | 2.1      | X                   | 0.0      |
| <b>N-C<sub>sph</sub> 700 °C</b> | 397.6         | 5.3      | 398.1 | 18.5     | 398.7 | 13.4     | 399.4 | 11.9     | 400.1                   | 17.1     | 400.7 | 21.8     | 401.4     | 7.3      | 402.0 | 3.7      | 403.0               | 1.1      |
| <b>N-C<sub>sph</sub> 900 °C</b> | 397.6         | 3.2      | 398.1 | 17.3     | 398.7 | 10.5     | 399.4 | 9.0      | 400.1                   | 16.0     | 400.7 | 25.2     | 401.4     | 12.8     | 402.1 | 6.1      | X                   | 0.0      |
| <b>N-Vulcan</b>                 | X             | 0.0      | 398.1 | 3.7      | 398.8 | 16.4     | 399.4 | 15.2     | 399.9                   | 21.9     | 400.7 | 24.4     | 401.3     | 13.8     | 402.1 | 4.4      | 402.8               | 0.3      |
| <b>N-GnP</b>                    | X             | 0.0      | 398.2 | 8.7      | 398.8 | 18.8     | 399.4 | 19.7     | 400.1                   | 21.1     | 400.6 | 18.7     | 401.2     | 9.7      | 402.2 | 3.3      | X                   | 0.0      |

Table S3: Fitting parameters (BE and relative percentage of the fit) of the N 1s measured in 100 mTorr of O<sub>2</sub> at 60 °C are displayed for all components of all samples. Components that are not present in a sample are denoted with an X in the BE column. The FWHM of all components is 1.0 eV.

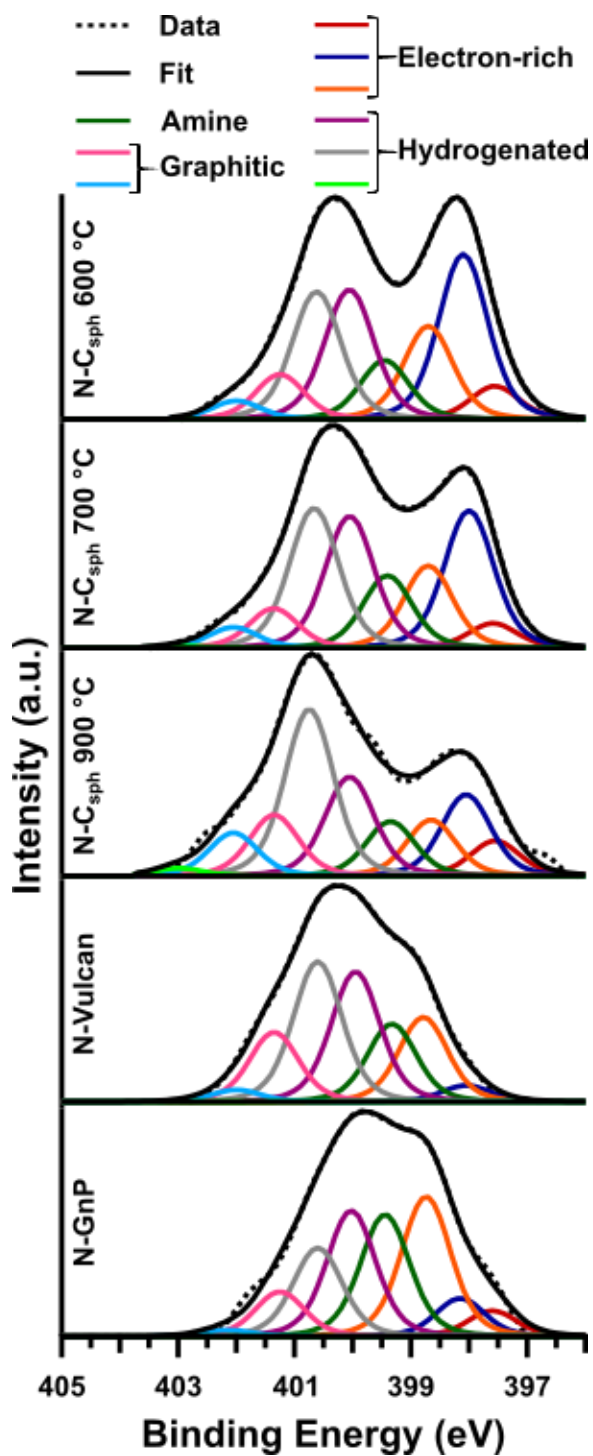

Figure S2: Deconvoluted N 1s spectra collected with synchrotron source energy (630 eV) at 100 mTorr O<sub>2</sub> and 100 mTorr H<sub>2</sub>O at 60 °C are shown for all N-C materials.

### N 1s Fitting Parameters – O<sub>2</sub> + H<sub>2</sub>O; 60 °C

| Component                       | Electron-rich |          |       |          |       |          | Amine |          | Hydrogenated (in-plane) |          |       |          | Graphitic |          |       |          | Hydrogenated (edge) |          |
|---------------------------------|---------------|----------|-------|----------|-------|----------|-------|----------|-------------------------|----------|-------|----------|-----------|----------|-------|----------|---------------------|----------|
|                                 | BE            | % of Fit | BE    | % of Fit | BE    | % of Fit | BE    | % of Fit | BE                      | % of Fit | BE    | % of Fit | BE        | % of Fit | BE    | % of Fit | BE                  | % of Fit |
| <b>N-C<sub>sph</sub> 600 °C</b> | 397.6         | 4.9      | 398.1 | 24.6     | 398.7 | 13.9     | 399.5 | 8.8      | 400.1                   | 19.4     | 400.6 | 18.9     | 401.3     | 6.7      | 402.0 | 2.8      | X                   | 0.0      |
| <b>N-C<sub>sph</sub> 700 °C</b> | 397.6         | 3.8      | 398.0 | 21.2     | 398.7 | 12.6     | 399.4 | 11.1     | 400.1                   | 20.3     | 400.7 | 21.6     | 401.4     | 6.0      | 402.1 | 3.2      | 403.0               | 0.3      |
| <b>N-C<sub>sph</sub> 900 °C</b> | 397.6         | 5.8      | 398.1 | 13.5     | 398.7 | 9.2      | 399.4 | 9.0      | 400.1                   | 16.5     | 400.7 | 27.5     | 401.4     | 10.1     | 402.1 | 7.2      | 403.0               | 1.3      |
| <b>N-Vulcan</b>                 | X             | 0.0      | 398.1 | 3.1      | 398.8 | 15.9     | 399.3 | 14.7     | 400.0                   | 24.5     | 400.6 | 26.4     | 401.4     | 13.2     | 402.0 | 2.2      | X                   | 0.0      |
| <b>N-GnP</b>                    | 397.6         | 4.3      | 398.2 | 6.4      | 398.7 | 23.8     | 399.4 | 20.7     | 400.0                   | 21.2     | 400.6 | 15.0     | 401.3     | 7.6      | 402.2 | 1.1      | X                   | 0.0      |

Table S4: Fitting parameters (BE and relative percentage of the fit) of the N 1s measured in 100 mTorr each of O<sub>2</sub> and H<sub>2</sub>O at 60 °C are displayed for all components of all samples. Components that are not present in a sample are denoted with an X in the BE column. The FWHM of all components is 1.0 eV.

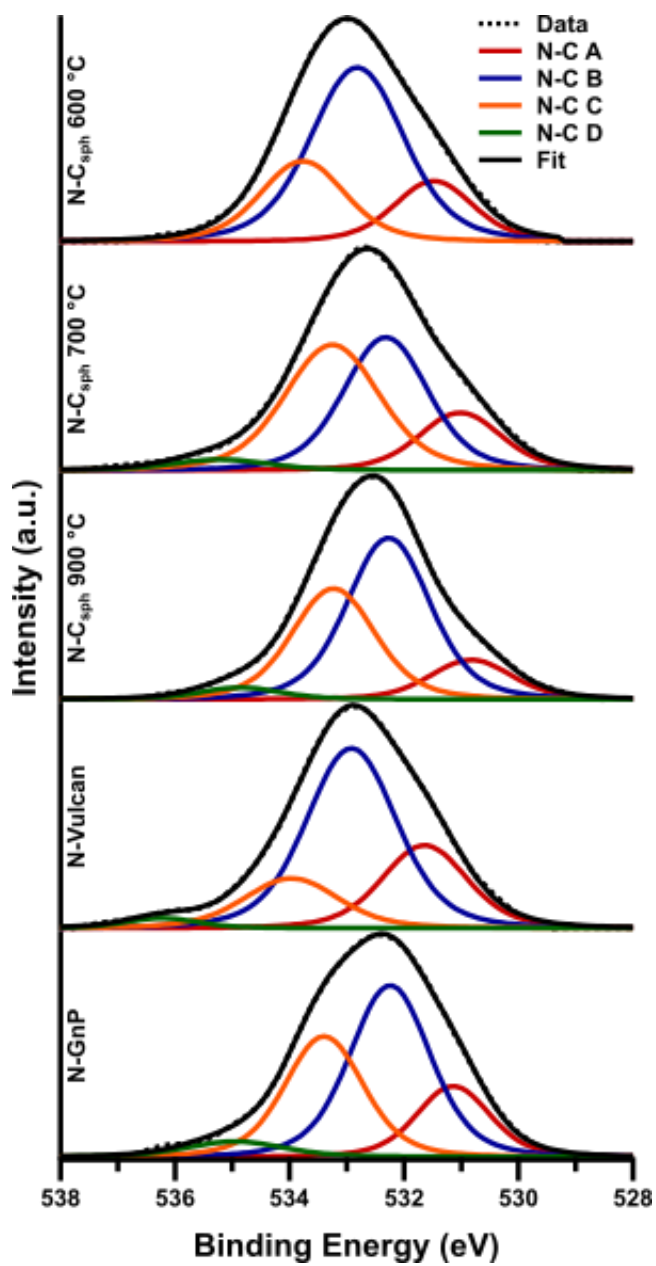

Figure S3: Deconvoluted O 1s spectra collected with synchrotron source energy (630 eV) at UHV are shown for all N-C materials.

### O 1s Fitting Parameters - UHV

| Component                       | N-C A |      |          | N-C B |      |          | N-C C |      |          | N-C D |      |          |
|---------------------------------|-------|------|----------|-------|------|----------|-------|------|----------|-------|------|----------|
|                                 | BE    | FWHM | % of fit |
| <b>N-C<sub>sph</sub> 600 °C</b> | 531.5 | 1.6  | 17.2     | 532.8 | 1.9  | 58.4     | 533.8 | 1.7  | 24.4     | X     | 0.0  | 0.0      |
| <b>N-C<sub>sph</sub> 700 °C</b> | 531.0 | 1.7  | 16.4     | 532.3 | 1.7  | 38.8     | 533.3 | 1.9  | 41.2     | 535.2 | 2.0  | 3.6      |
| <b>N-C<sub>sph</sub> 900 °C</b> | 530.8 | 1.7  | 12.0     | 532.3 | 1.7  | 50.0     | 533.2 | 1.7  | 34.4     | 534.9 | 1.7  | 3.6      |
| <b>N-Vulcan</b>                 | 531.6 | 1.7  | 24.6     | 532.9 | 1.8  | 56.5     | 534.0 | 1.9  | 16.4     | 536.2 | 1.5  | 2.5      |
| <b>N-GnP</b>                    | 531.1 | 1.5  | 17.3     | 532.2 | 1.6  | 46.1     | 533.4 | 1.6  | 31.6     | 535.0 | 2.0  | 5.0      |

Table S5: Fitting parameters (BE, FWHM in eV, and relative percentage of the fit) of the O 1s measured at UHV and ambient temperature are displayed for all components of all samples.

Components that are not present in a sample are denoted with an X in the BE column.

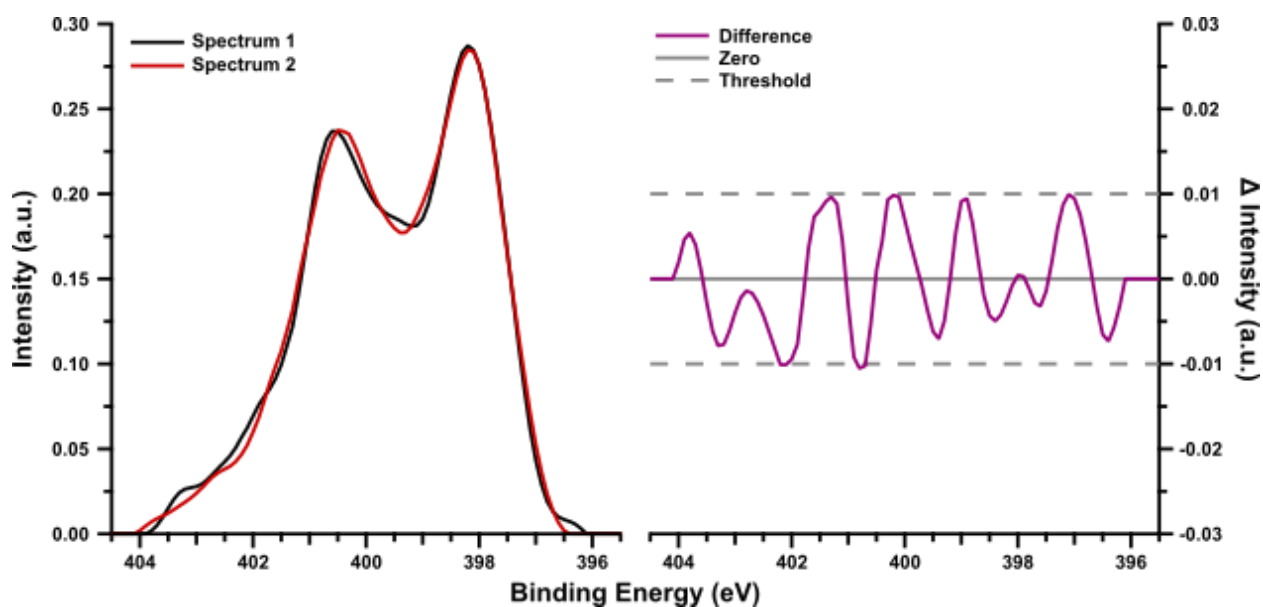

Figure S4: Overlaid N 1s spectra taken with the exact same conditions are shown along with the difference spectrum in order to validate the use of a threshold to remove instrumental noise.



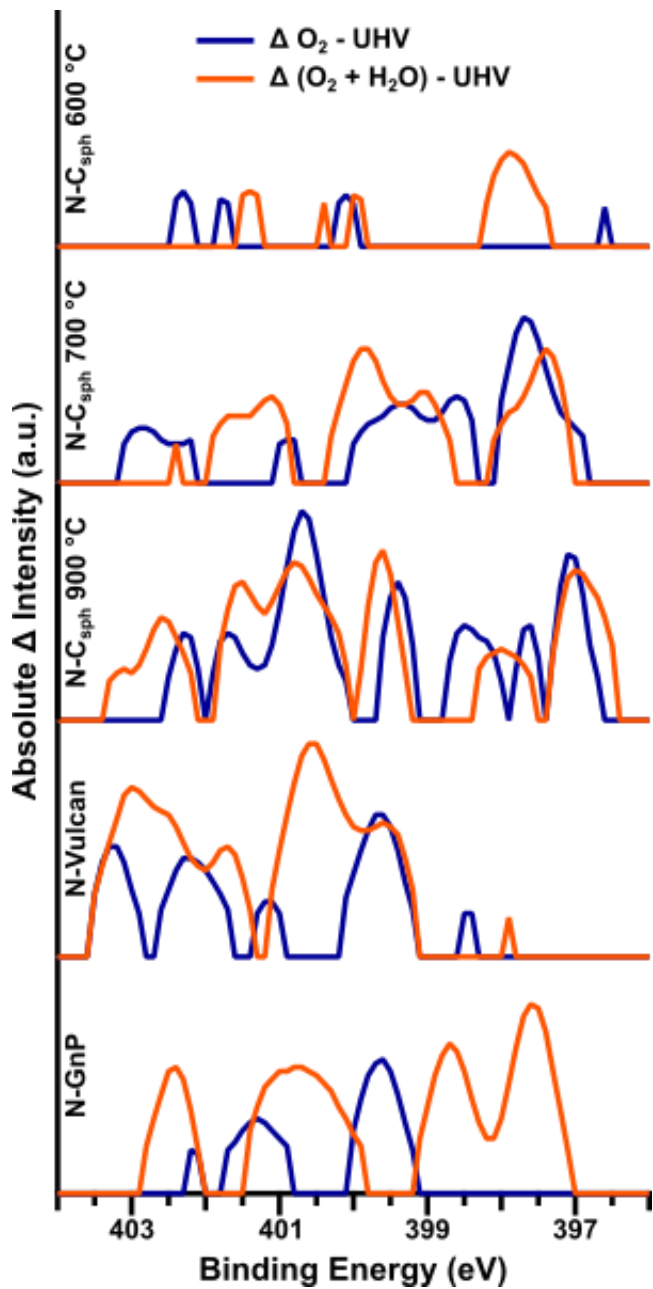

Figure S5: Absolute N 1s difference spectra are shown for each atmosphere, relative to UHV measurements and after thresholding. These spectra are integrated to produce a value for the total change in N 1s.

### O 1s Fitting Parameters – O<sub>2</sub>; 60 °C

| Component                 | N-C A     |     |      | N-C B    |     |      | N-C C    |     |      | N-C D    |     |      | O <sub>ads</sub> |     |      | O <sub>2</sub> (v) 1 |     |      | O <sub>2</sub> (v) 2 |     |      |
|---------------------------|-----------|-----|------|----------|-----|------|----------|-----|------|----------|-----|------|------------------|-----|------|----------------------|-----|------|----------------------|-----|------|
|                           | Sample ID | BE  | FWHM | % of fit         | BE  | FWHM | % of fit             | BE  | FWHM | % of fit             | BE  | FWHM |
| N-C <sub>sph</sub> 600 °C | 531.5     | 1.6 | 8.4  | 532.8    | 1.9 | 28.5 | 533.8    | 1.7 | 11.9 | X        | 0.0 | 0.0  | 530.6            | 1.0 | 0.8  | 538.6                | 0.8 | 34.5 | 539.7                | 0.9 | 15.9 |
| N-C <sub>sph</sub> 700 °C | 531.0     | 1.7 | 9.1  | 532.3    | 1.7 | 21.4 | 533.3    | 1.9 | 22.7 | 535.2    | 2.0 | 2.0  | 533.6            | 2.0 | 2.2  | 538.7                | 0.8 | 29.9 | 539.8                | 0.8 | 12.7 |
| N-C <sub>sph</sub> 900 °C | 530.8     | 1.7 | 4.9  | 532.3    | 1.7 | 20.3 | 533.2    | 1.7 | 13.9 | 534.9    | 1.7 | 1.5  | 534.0            | 1.8 | 3.1  | 538.7                | 0.7 | 38.3 | 539.8                | 0.8 | 18.2 |
| N-Vulcan                  | 531.6     | 1.7 | 7.5  | 532.9    | 1.8 | 17.3 | 534.0    | 1.9 | 5.0  | 536.2    | 1.5 | 0.8  | 533.6            | 1.0 | 1.4  | 538.9                | 0.8 | 46.7 | 540.0                | 0.8 | 21.3 |
| N-GnP                     | 531.1     | 1.5 | 6.9  | 532.3    | 1.6 | 18.5 | 533.4    | 1.6 | 12.7 | 535.0    | 2.0 | 2.0  | 534.4            | 1.2 | 0.8  | 538.7                | 0.8 | 39.6 | 539.9                | 0.9 | 19.5 |

Table S6: Fitting parameters (BE, FWHM in eV, and relative percentage of the fit) of the N 1s measured in 100 mTorr of O<sub>2</sub> at 60 °C are displayed for all components of all samples.

Components that are not present in a sample are denoted with an X in the BE column.

### O 1s Fitting Parameters – O<sub>2</sub> + H<sub>2</sub>O; 60 °C

| Component                 | N-C A     |     |      | N-C B    |     |      | N-C C    |     |      | N-C D    |     |      | O <sub>ads</sub> |     |      | O <sub>2</sub> (v) 1 |     |      | O <sub>2</sub> (v) 2 |     |      | H <sub>2</sub> O (v) |     |      |
|---------------------------|-----------|-----|------|----------|-----|------|----------|-----|------|----------|-----|------|------------------|-----|------|----------------------|-----|------|----------------------|-----|------|----------------------|-----|------|
|                           | Sample ID | BE  | FWHM | % of fit         | BE  | FWHM | % of fit             | BE  | FWHM | % of fit             | BE  | FWHM | % of fit             | BE  | FWHM |
| N-C <sub>sph</sub> 600 °C | 531.5     | 1.6 | 7.4  | 532.8    | 1.9 | 25.2 | 533.8    | 1.7 | 10.5 | X        | 0.0 | 0.0  | 530.6            | 1.1 | 1.4  | 538.6                | 0.8 | 23.1 | 539.8                | 0.9 | 10.0 | 535.2                | 0.8 | 22.4 |
| N-C <sub>sph</sub> 700 °C | 531.0     | 1.7 | 6.9  | 532.3    | 1.7 | 16.3 | 533.3    | 1.9 | 17.3 | 535.2    | 2.0 | 1.5  | 533.1            | 1.1 | 2.3  | 538.6                | 0.8 | 22.7 | 539.8                | 0.8 | 9.9  | 535.2                | 0.8 | 23.1 |
| N-C <sub>sph</sub> 900 °C | 530.8     | 1.7 | 3.6  | 532.3    | 1.7 | 14.9 | 533.2    | 1.7 | 10.3 | 534.9    | 1.7 | 1.1  | 533.7            | 2.1 | 3.1  | 538.8                | 0.7 | 27.7 | 539.9                | 0.8 | 12.8 | 535.3                | 0.8 | 26.6 |
| N-Vulcan                  | 531.7     | 1.7 | 4.8  | 532.9    | 1.8 | 11.0 | 534.0    | 1.9 | 3.2  | 536.2    | 1.5 | 0.5  | 533.6            | 1.0 | 2.6  | 538.9                | 0.8 | 32.2 | 540.1                | 0.8 | 14.3 | 535.5                | 0.8 | 31.4 |
| N-GnP                     | 531.2     | 1.5 | 4.5  | 532.2    | 1.6 | 11.9 | 533.4    | 1.6 | 8.1  | 535.0    | 2.0 | 1.3  | 532.7            | 1.5 | 4.3  | 538.8                | 0.8 | 28.4 | 539.9                | 0.9 | 13.2 | 535.3                | 0.8 | 28.3 |

Table S7: Fitting parameters (BE, FWHM in eV, and relative percentage of the fit) of the O 1s measured in 100 mTorr each of O<sub>2</sub> and H<sub>2</sub>O at 60 °C are displayed for all components of all samples. Components that are not present in a sample are denoted with an X in the BE column.
